# Supplementary material for: A conserved structure within the HIV gag open reading frame that controls translation initiation directly recruits the 40S subunit and eIF3
Source: PubMed Central journal article supplement — Nucleic Acids Res. 2010 Nov 11;39(6):2367–77. doi: 10.1093/nar/gkq1118 (PMC3064776; doi:10.1093/nar/gkq1118), 2010-11-11
Supplement: supp_gkq1118_Locker_SupplementaryFigure.pdf [file supp_gkq1118_Locker_SupplementaryFigure.pdf]

g 545 **AUGGGCGCGA GAAACUCCGU CUUGAGAGGG AAAAAAGCAG**  
**AUGAAUUGA AAGAAUCAGG UUACGGCCCG GCGGAAAGAA AAAGUACAGG**  
**CUAAAACAUU UUGUGUGGGC AGCGAAUAAA UUGGACAGAU UCGGAUUAGC**  
**AGAGAGCCUG UUGGAGUCAA AAGAGGGUUG UCAAAAAAUU CUUACAGUUU**  
**UAGAUCCAAU GGUACCGACA GGUUCAGAAA AUUUAAAAAG UCUUUUUAUU**  
**ACUGUCUGCG UCAUUUGGUG CAUACACGCA GAAGAGAAAG UGAAAGAUAC**  
**UGAAGGAGCA AAACAAAUAG UGCGGAGACA UCUAGUGGCA GAAACAGGAA**  
**CUGCAGAGAA AAUGCCAAGC ACAAGUAGAC CAACAGCACC AUCUAGCGAG**  
**AAGGGAGGAA AUUACCCAGU GCAACAUGUA GGCGGCAACU ACACCCAUAU**  
ACCGCUGAGU CCCCGAACCC UA 1006 *ucuagatc uagacgccga*  
*gaucagaaaau cccucucucg gaucgcauuu ggacuucugc cuucgggcac*  
*cacggucgga uccgaauuc*

**Supplementary Figure 1: Primary sequence of the StreptoTag-HIV-2 gag IRES RNA used for affinity purification of initiation complexes.** The sequence of the IRES element 545-965 (from the first to the third AUG) is in bold capital, additional 41 nucleotides from the gag coding region (capital letters) separate the IRES from the StreptoTag (in italic), the sequence of the streptomycin aptamer is underlined. Initiation codons are boxed. The nucleotide in the 5' of the first AUG is a non encoded nucleotide added for the T7 transcription.

**A**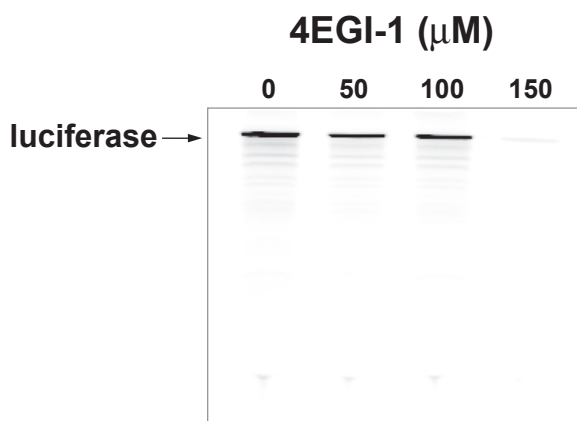**B**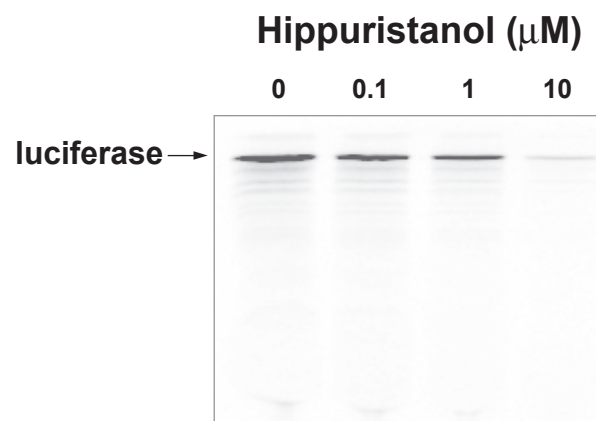

**Supplementary Figure 2: Translation of the luciferase gene in the presence of different inhibitors of translation.** Transcripts (10 ng per  $\mu\text{L}$ ) were translated in RRL in the presence of **(A)** increasing concentration of 4EGI-1 (0, 50, 100 and 150  $\mu\text{M}$ ) or **(B)** increasing concentrations of Hippuristanol (0, 0.1, 1 and 10  $\mu\text{M}$ ). Products were resolved on a 20% SDS-PAGE gel.

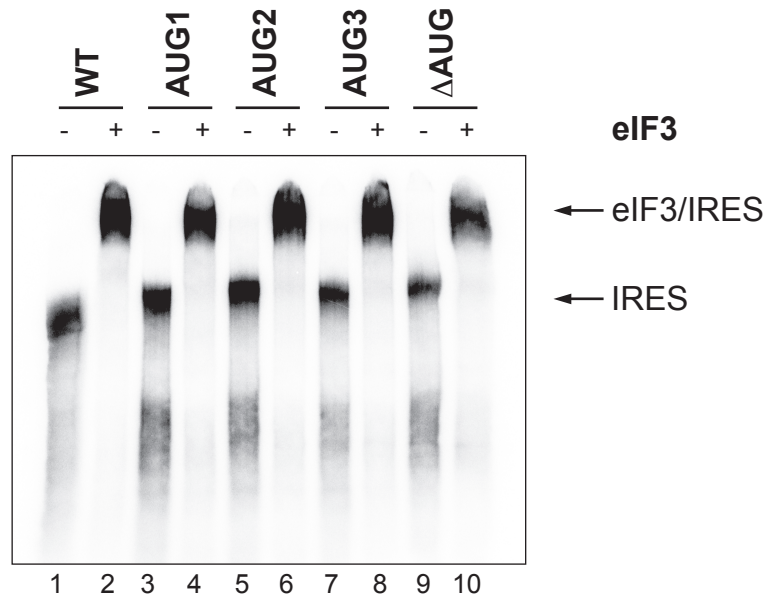

**Supplementary Figure 3: Binding of HIV-2 *gag* IRES to eIF3.** Reactions contain 0.5 nM of <sup>32</sup>P end labeled HIV-2 *gag* IRES in the absence or presence of 200 nM of purified eIF3. RNAs present in Lane 1 - 2, 3 - 4, 5 - 6, 7 - 8, and 9 - 10 are HIV-2 *gag* IRES, AUG1 mutant, AUG2 mutant, AUG3 mutant and ΔAUG mutant, respectively.

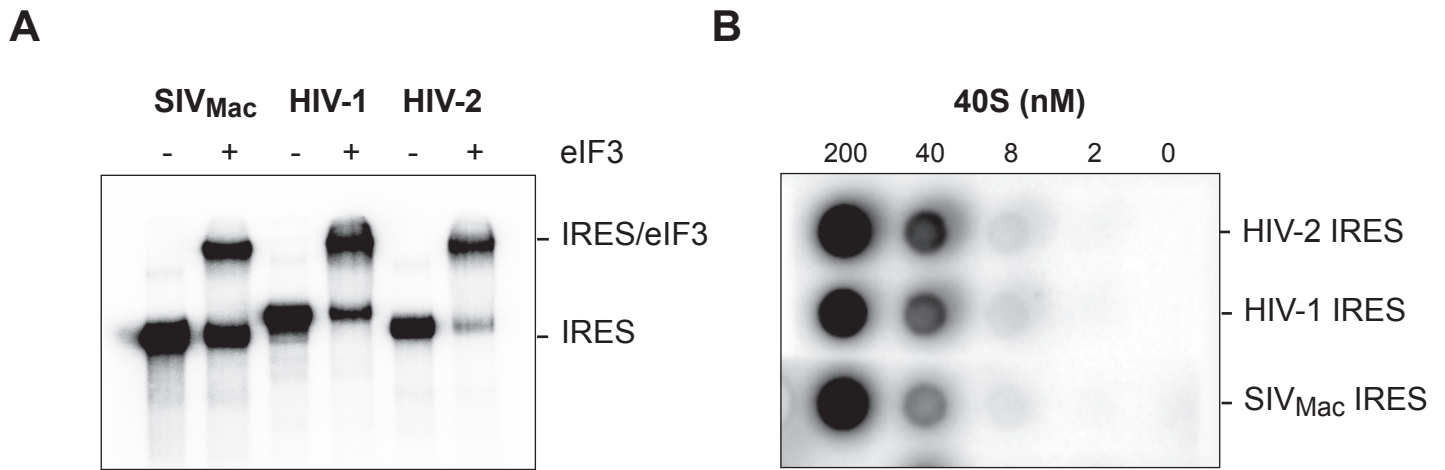

**Supplementary Figure 4: Binding of HIV-1 and SIV<sub>Mac</sub> gag IRES to eIF3 and to the 40S subunit . (A)** 4% acrylamide native gel of reaction containing 0.5 nM of <sup>32</sup>P end labeled HIV-2, HIV-2 and SIV<sub>Mac</sub> gag IRES in the absence or presence of 200 nM of purified eIF3. **(B)** filter binding assays performed with 0.5 nM of <sup>32</sup>P end labeled HIV-2, HIV-2 and SIV<sub>Mac</sub> gag IRES in the absence or presence of increasing concentration of 40S subunits.
